# Supplementary material for: Distribution of lag-1 Alleles, ORF7, and ORF8 Genes of Lipopolysaccharide and Sequence-Based Types Among Legionella pneumophila Serogroup 1 Isolates in Japan and China
Source: PubMed Central journal article supplement (PMC6691400; doi:10.3389/fcimb.2019.00274), 2019-08-05
Supplement: Image_1.pdf [file Image_1.pdf]

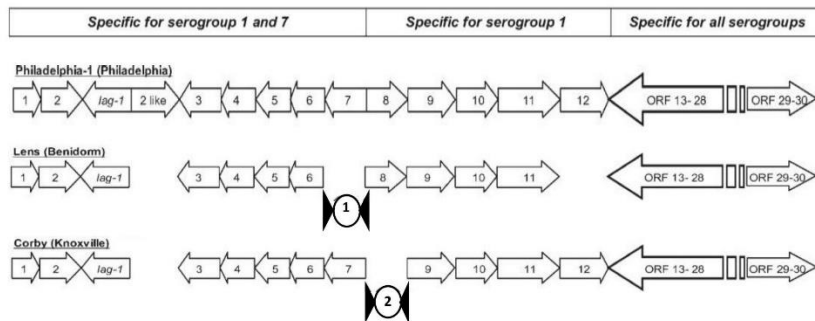

**Supplementary Figure S1** Schematic representation of regions of the LPS synthesis cluster in published *L. pneumophila* serogroup 1 strains and localization of the serogroup1-specific (indicated by arrowheads) and subgroup-specific primer pairs (indicated by arrowheads and circled numbers 1, 2), see also Table S1. The regions are: ① Benidorm/Bellingham ORF 6–8, ② Knoxville ORF 7–9.
